# Supplementary material
Source: publisher site journal article supplement (https://www.dovepress.com/article/supplementary_file/594983/594983%20Revised%20Supplementary%20Materials.docx)
Supplement: Supplementary file 1 [file 594983%20Revised%20Supplementary%20Materials.docx]

**Appendix 1**

| **General Information Questionnaire** |
| --- |
| A1 Age: years old |
| A2 Gender： 🞎Male 🞎Female |
| A3 Grade Level: ： 🞎Middle School 🞎High School |
| A4 Boarding： 🞎Yes 🞎No |
| A5 Partnership： 🞎Okay 🞎Not okay |
| A6 Height： cm |
| A7 Weight： kg |

**Appendix 2**

Please carefully read the following statements and select the option that best describes your situation. Mark the corresponding box with a "√". 1 represents “Never,” 2 represents “Rarely,” 3 represents “Sometimes,” 4 represents “Often.”

| **Item** | **Never** | **Rarely** | **Sometimes** | **Often** |
| --- | --- | --- | --- | --- |
| 1. I respect my body. | 1 | 2 | 3 | 4 |
| 2. I feel my body is quite good. | 1 | 2 | 3 | 4 |
| 3. I think my body has some pretty good aspects. | 1 | 2 | 3 | 4 |
| 4. I have a positive attitude toward my body. | 1 | 2 | 3 | 4 |
| 5. I pay attention to my body's needs. | 1 | 2 | 3 | 4 |
| 6. I like my body. | 1 | 2 | 3 | 4 |
| 7. I appreciate having a unique and different body shape. | 1 | 2 | 3 | 4 |
| 8. I treat my body with a positive attitude. For example: holding my head high and smiling at people. | 1 | 2 | 3 | 4 |
| 9. I am comfortable with my body shape. | 1 | 2 | 3 | 4 |
| 10. Although I am not as attractive as figures in the media (e.g., models, actors), I still feel beautiful. | 1 | 2 | 3 | 4 |

**Appendix 3**

Please answer the following questions based on your actual situation over the past month. Each question has five options ranging from “Never” to “Always,” each corresponding to a different score.

**Healthy Weight Management Practices**

1.Exercise 🞎Never（0） 🞎Rarely（1） 🞎Sometimes（2） 🞎Often（3） 🞎Always（4）

2.Eat more fruits and vegetables 🞎Never（0） 🞎Rarely（1） 🞎Sometimes（2） 🞎Often（3） 🞎Always（4）

3.Maintain regular meal times 🞎Never（0） 🞎Rarely（1） 🞎Sometimes（2） 🞎Often（3） 🞎Always（4）

4.Reduce intake of high-sugar foods. 🞎Never（0） 🞎Rarely（1） 🞎Sometimes（2） 🞎Often（3） 🞎Always（4）

5.Reduce intake of high-fat foods 🞎Never（0） 🞎Rarely（1） 🞎Sometimes（2） 🞎Often（3） 🞎Always（4）

**Unhealthy weight control behaviors**

6.Extreme restrictive diet 🞎Never（0） 🞎Rarely（1） 🞎Sometimes（2） 🞎Often（3） 🞎Always（4）

7.Self-induced vomiting 🞎Never（0） 🞎Rarely（1） 🞎Sometimes（2） 🞎Often（3） 🞎Always（4）

1. Taking laxatives or diuretics 🞎Never（0） 🞎Rarely（1） 🞎Sometimes（2） 🞎Often（3） 🞎Always（4）

9.Prolonged fasting 🞎Never（0） 🞎Rarely（1） 🞎Sometimes（2） 🞎Often（3） 🞎Always（4）

10.Take diet pills 🞎Never（0） 🞎Rarely（1） 🞎Sometimes（2） 🞎Often（3） 🞎Always（4）

**Appendix 4**

Based on your actual situation over the past month, answer the following questions. Each question has 5 options ranging from “Never” to “Always,” each corresponding to a different score.

**Eating Habits**

1.Eating breakfast every day 🞎Never（0） 🞎Rarely（1） 🞎Sometimes（2） 🞎Often（3） 🞎Always（4）

2.Limit the intake of sugary drinks. 🞎Never（0） 🞎Rarely（1） 🞎Sometimes（2） 🞎Often（3） 🞎Always（4）

3.Eat a variety of vegetables and fruits 🞎Never（0） 🞎Rarely（1） 🞎Sometimes（2） 🞎Often（3） 🞎Always（4）

**Physical Activity**

4.Engage in at least 30 minutes of moderate-intensity exercise daily. 🞎Never（0） 🞎Rarely（1） 🞎Sometimes（2） 🞎Often（3） 🞎Always（4）

5.Perform muscle strength training at least twice a week. 🞎Never（0） 🞎Rarely（1） 🞎Sometimes（2） 🞎Often（3） 🞎Always（4）

**Sleep Behavior**

6.Ensure 7 to 9 hours of sleep every night. 🞎Never（0） 🞎Rarely（1） 🞎Sometimes（2） 🞎Often（3） 🞎Always（4）

7.Maintain a regular sleep schedule 🞎Never（0） 🞎Rarely（1） 🞎Sometimes（2） 🞎Often（3） 🞎Always（4）

**Stress Management**

8.Relieve stress by exercising 🞎Never（0） 🞎Rarely（1） 🞎Sometimes（2） 🞎Often（3） 🞎Always（4）

9.Manage stress through meditation, deep breathing, or other relaxation techniques. 🞎Never（0） 🞎Rarely（1） 🞎Sometimes（2） 🞎Often（3） 🞎Always（4）

**Screen Time**

10.Limit daily screen time (TV, computer, phone, etc.) to within 2 hours. 🞎Never（0） 🞎Rarely（1） 🞎Sometimes（2） 🞎Often（3） 🞎Always（4）

**Social Activities**

11.Attend at least one social event each week. 🞎Never（0） 🞎Rarely（1） 🞎Sometimes（2） 🞎Often（3） 🞎Always（4）
